# Supplementary material for: Surface Antigen 1 Is a Crucial Secreted Protein That Mediates Babesia microti Invasion Into Host Cells
Source: Front Microbiol. 2020 Jan 15;10:3046. doi: 10.3389/fmicb.2019.03046 (PMC6974462; doi:10.3389/fmicb.2019.03046)
Supplement: Supplementary file 1 [file Table_1.XLSX]

## Sheet: sheet
Table S1 LC-MS/MS analysis of B. microti culture supernatant
locus_tag	Accession	Description	MW [kDa]	Score	Coverage	# Unique Peptides	# Peptides
BmR1_03g01010	A0A0K3ATB2	Uncharacterized protein	8.6798	29.368	44.2	3	3
BmR1_03g08780	A0A0K3ATB2	Uncharacterized protein	8.67464	97.2621	37.66	2	2
BmR1_03g00785	A0A0K3AT66	BMN1 family, BMN1-9, BmSA1 orthologue	35.417	126.787	17.06	3	3
BmR1_03g06145	I7IH96	Histone H4	11.4044	41.0031	11.65	1	1
BmR1_03g00800	A0A0K3ALZ1	Uncharacterized protein	13.109	22.504	10.9	1	1
BmR1_03g04550	A0A0K3ASC0	Uncharacterized protein	15.359	7.5663	10.1	1	1
BmR1_01g00233 BmR1_01g00230	I7INY8	Glyceraldehyde-3-phosphate dehydrogenase	38.3086	148.893	8.68	2	2
BmR1_03g09415	I7IA31	Uncharacterized protein	12.065	5.9194	7.6	1	1
BmR1_02g00255	I7J5U4	Uncharacterized protein	11.116	6.0384	7.2	1	1
BmR1_01g00020	I7J7V6	L-lactate dehydrogenase	36.5792	114.566	6.63	2	2
BmR1_03g08775	I7IHJ7	Molecular chaperone HtpG	82.3037	238.355	5.06	3	3
BmR1_03g00425	A0A0K3AQG1	Uncharacterized protein	21.949	5.9951	4.7	1	1
BmR1_03g01915	A0A0K3AN90	Uncharacterized protein	28.154	6.4058	4.6	1	1
BmR1_03g07730	I7I9W2	Splicing factor 3B subunit 4	26.586	6.4648	4.6	1	1
BmR1_03g06560	I7I9R7	Uncharacterized protein	44.111	7.2217	4.5	1	1
BmR1_03g00410	A0A0K3AM83	Uncharacterized protein	29.2005	30.35	3.91	1	1
BmR1_03g03645	A0A0K3ANN2	GTP-binding nuclear protein	24.1174	40.47	3.77	1	1
BmR1_01g01735	I7J8D7	Uncharacterized protein	27.282	9.3606	3.7	1	1
BmR1_01g02595	I7IPJ0	Uncharacterized protein	54.598	6.8699	3.7	1	1
BmR1_02g02100	I7I8S1	Uncharacterized protein	36.507	15.47	3.6	1	1
BmR1_03g01010	I7IS74	Enolase [EC:4.2.1.11]	47.4903	77.99	3.42	1	1
BmR1_01g00475	I7IF78	Uncharacterized protein	46.5644	39.2494	2.9	1	1
BmR1_03g09060	I7IHK8	Transcription initiation factor TFIIH subunit H4	70.279	6.8699	2.9	1	1
BmR1_03g05565	I7IS46	Obg-like ATPase 1	45.5386	30.03	2.74	1	1
BmR1_01g02545	P90655	Heat shock protein 70	70.2874	345.168	2.64	2	2
BmR1_02g00675	I7IG30	Uncharacterized protein	42.871	5.8232	2.6	1	1
BmR1_03g03490	A0A0K3ARN2	Elongation factor 1-alpha	49.3196	103.911	2.46	1	1
BmR1_01g02710	I7IFR1	Uncharacterized protein	47.1091	32.39	2.4	1	1
BmR1_02g01750	I7I8Q7	Uncharacterized protein	59.8557	33.56	1.81	1	1
BmR1_03g02530	A0A0K3ARM4	Uncharacterized protein	70.655	5.7923	1.8	1	1
BmR1_03g03960	A0A0K3API5	Uncharacterized protein	56.079	6.1261	1.7	1	1
BmR1_03g04980	I7JCH6	Uncharacterized protein	62.1545	34.3584	1.65	1	1
BmR1_03g04665	A0A0K3AVA3	Uncharacterized protein	91.7851	40.56	1.45	1	1
BmR1_01g01755	I7I819	Uncharacterized protein	69.416	6.5158	1.2	1	1
BmR1_03g00825	A0A0K3ALZ6	Uncharacterized protein	26.66	2.19	1	1	1
BmR1_03g06175	I7IH97	Uncharacterized protein	76.174	5.8772	1	1	1
BmR1_03g06625	I7ISB7	Uncharacterized protein	113.69	7.865	0.9	1	1
BmR1_01g03015	I7J8X4	Structural maintenance of chromosomes protein	134.04	5.9473	0.9	1	1
BmR1_02g03740	I7I8Y5	Uncharacterized protein	165.9	5.8041	0.8	1	1
BmR1_03g05220	I7IH59	Uncharacterized protein	171.65	5.718	0.7	1	1
